# Supplementary material
Source: Springer Nature journal article supplement (https://www.springermedizin.de/resource/supplementary/12885_2009_2018_MOESM8_ESM.pdf/9460322)

A

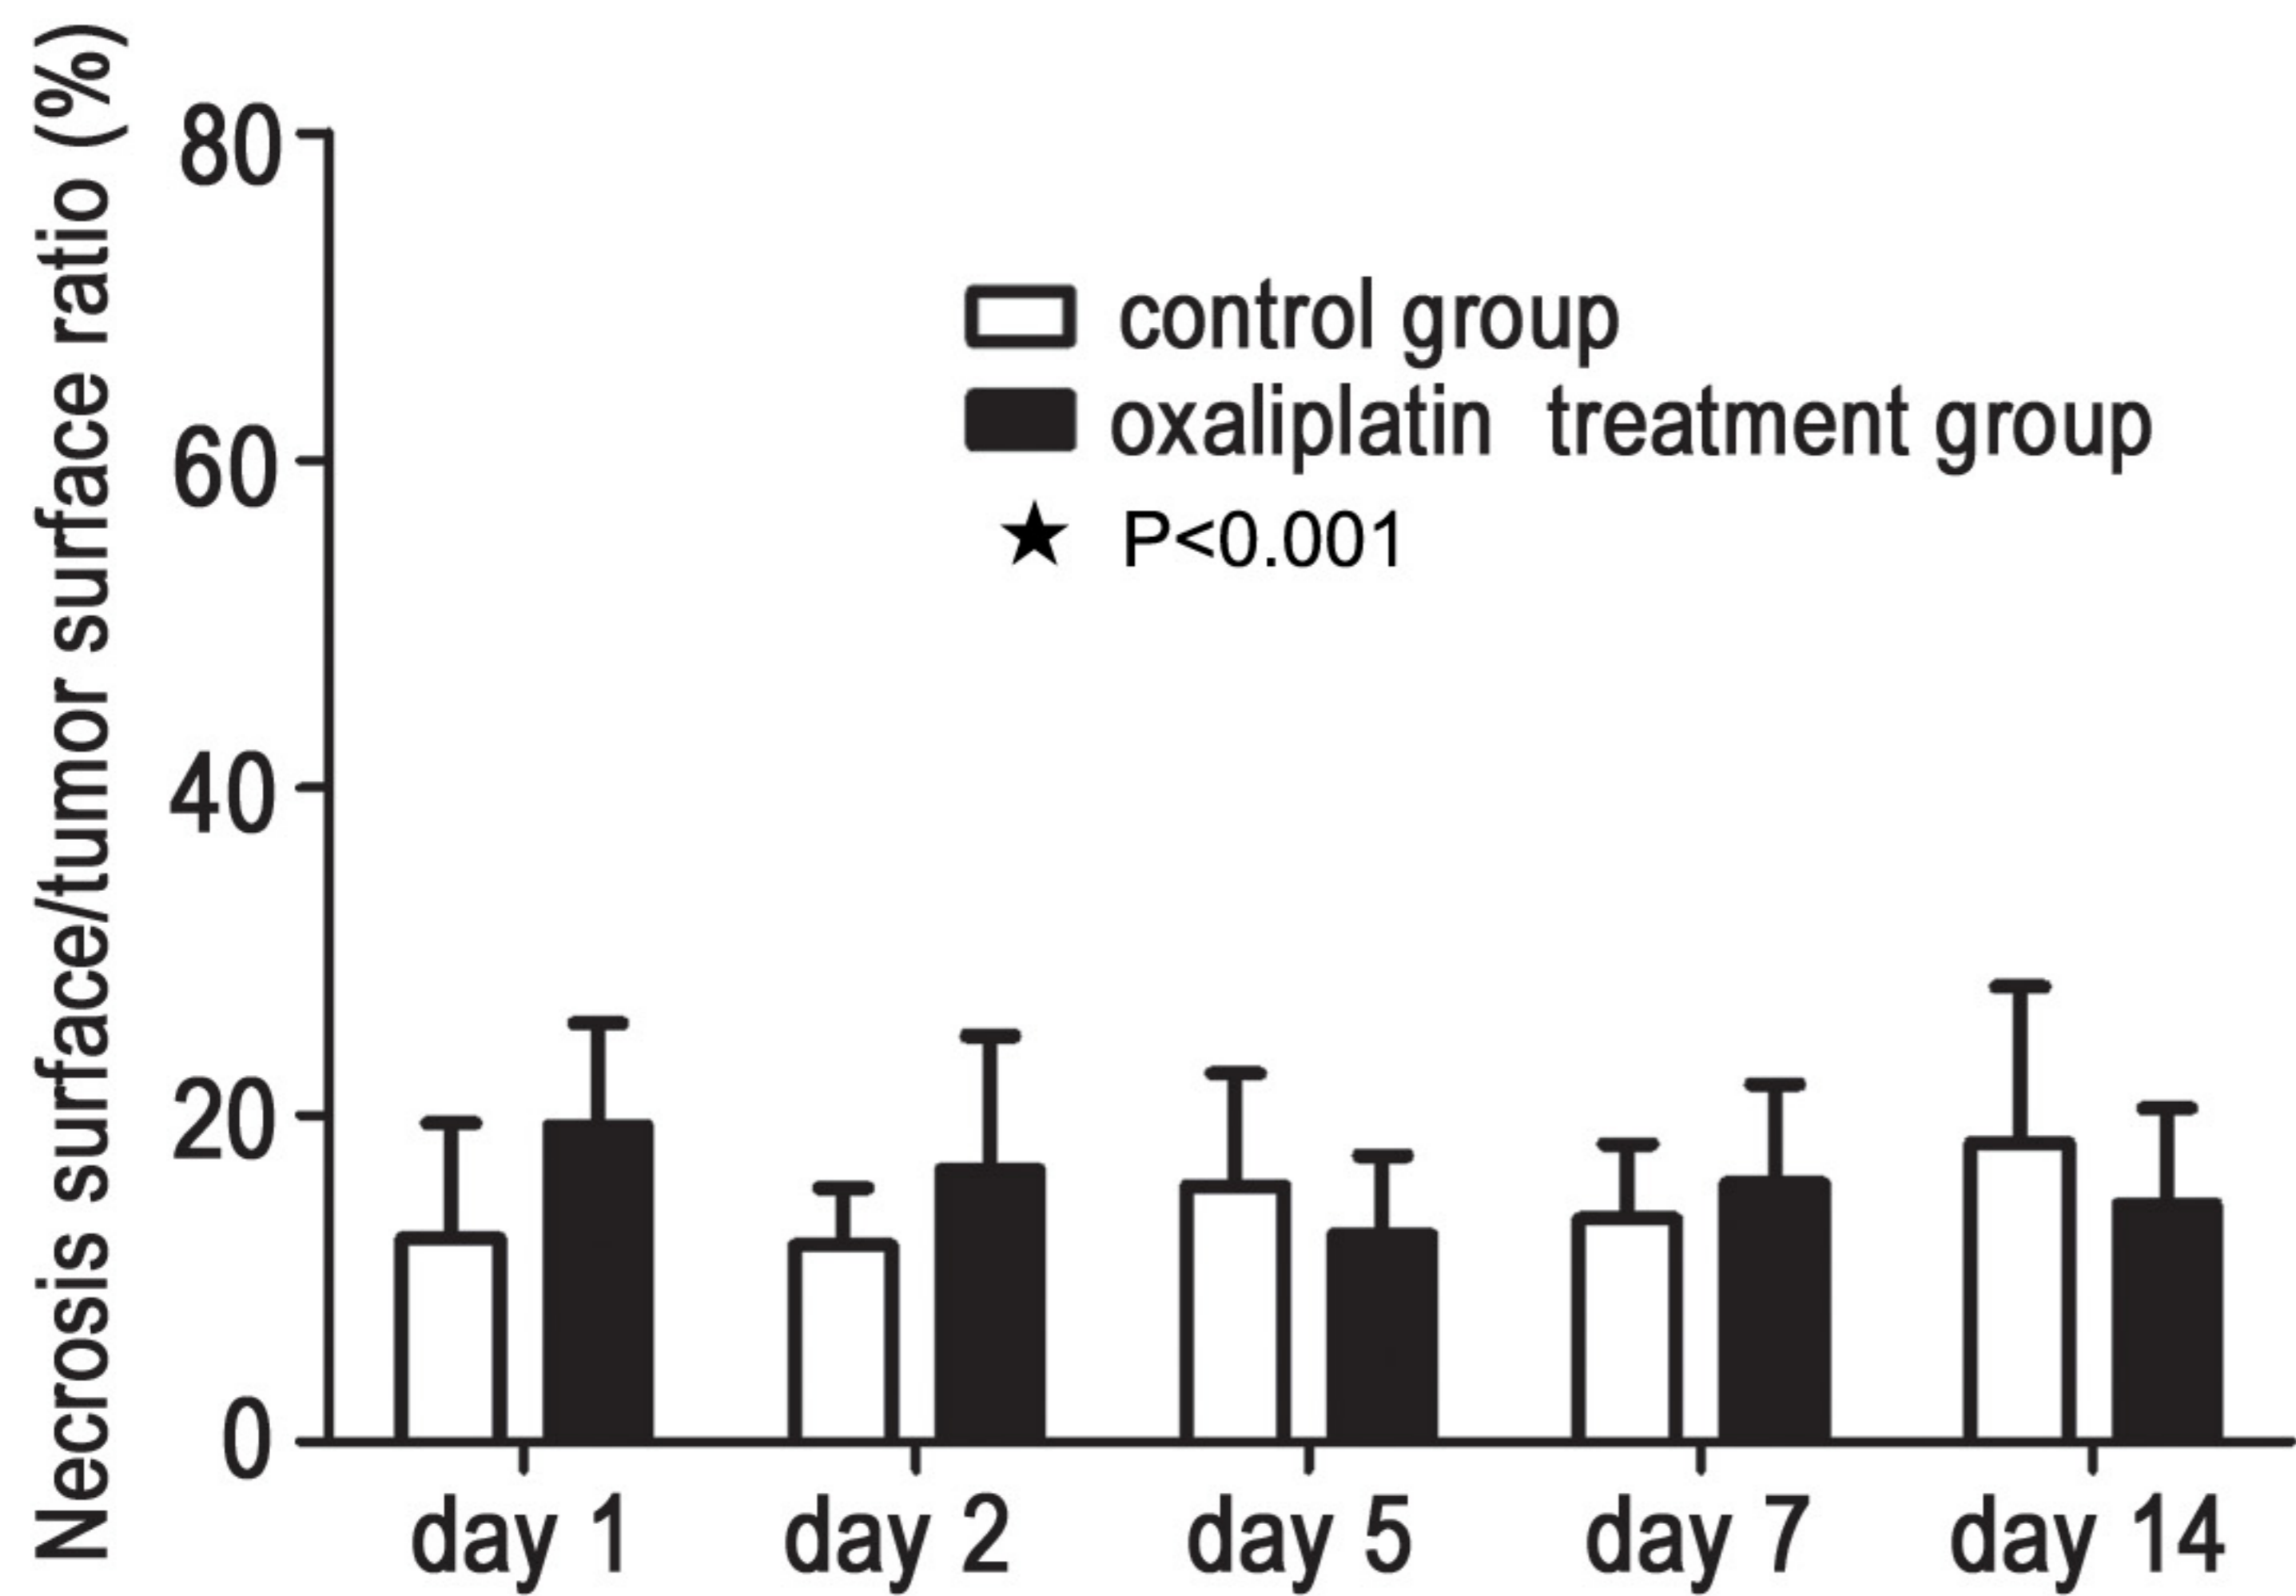

B

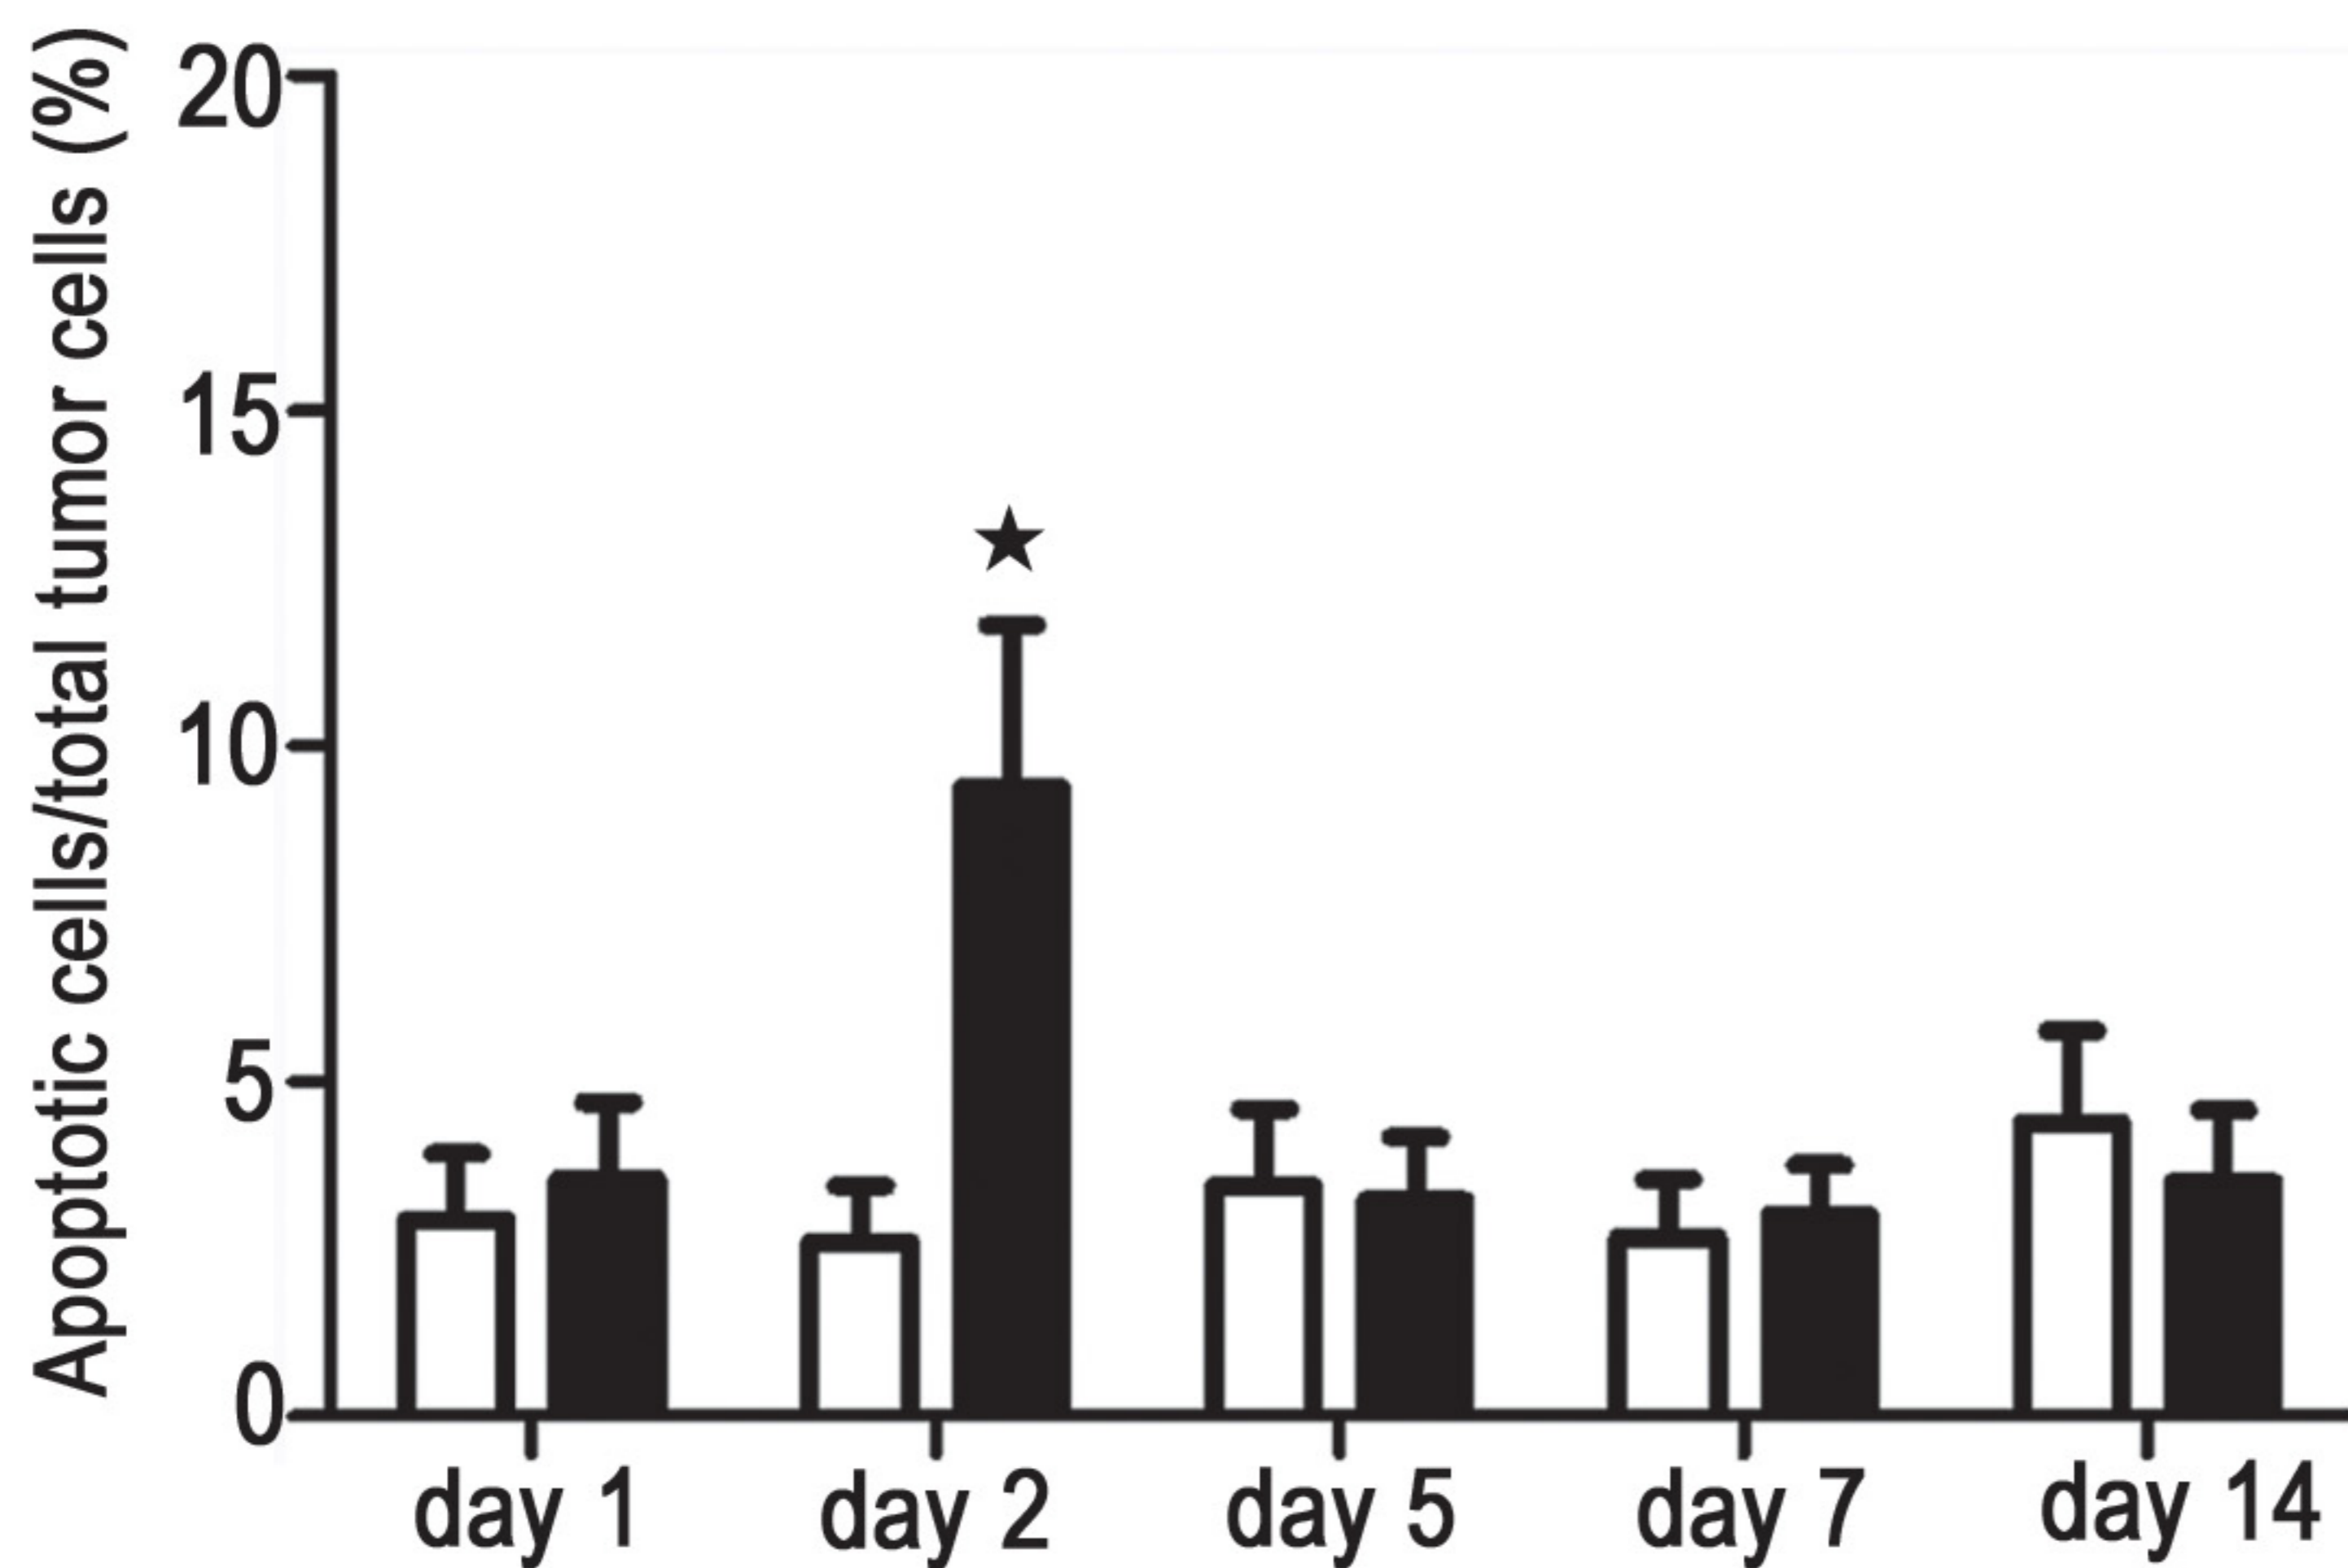

C

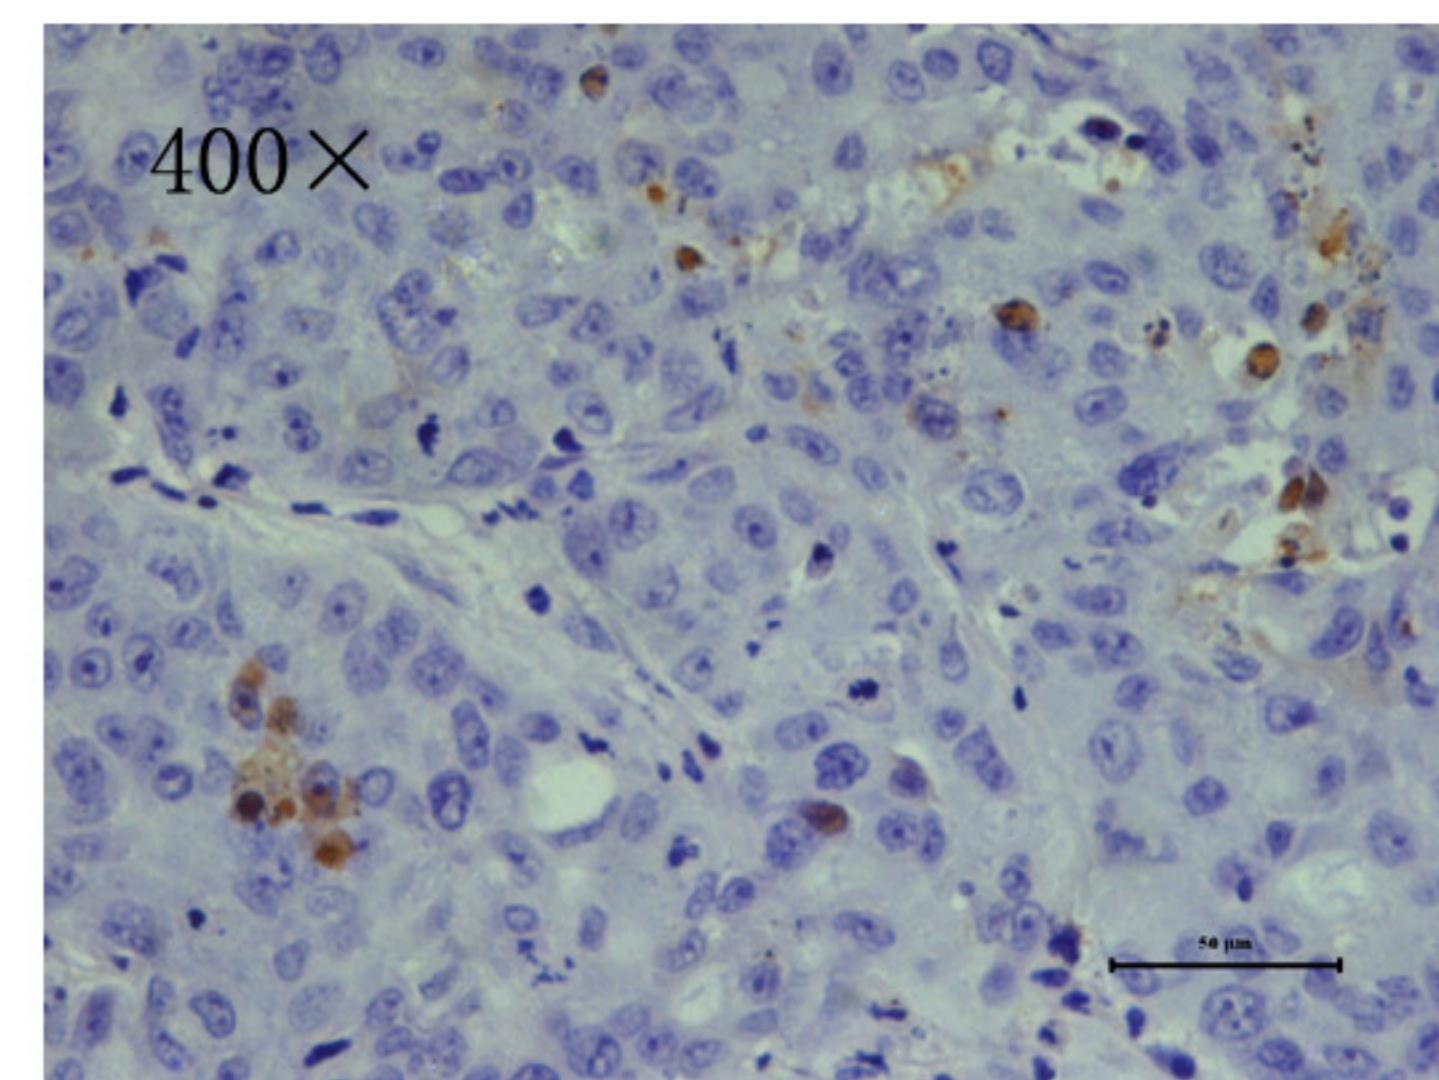

Control group (day 2)

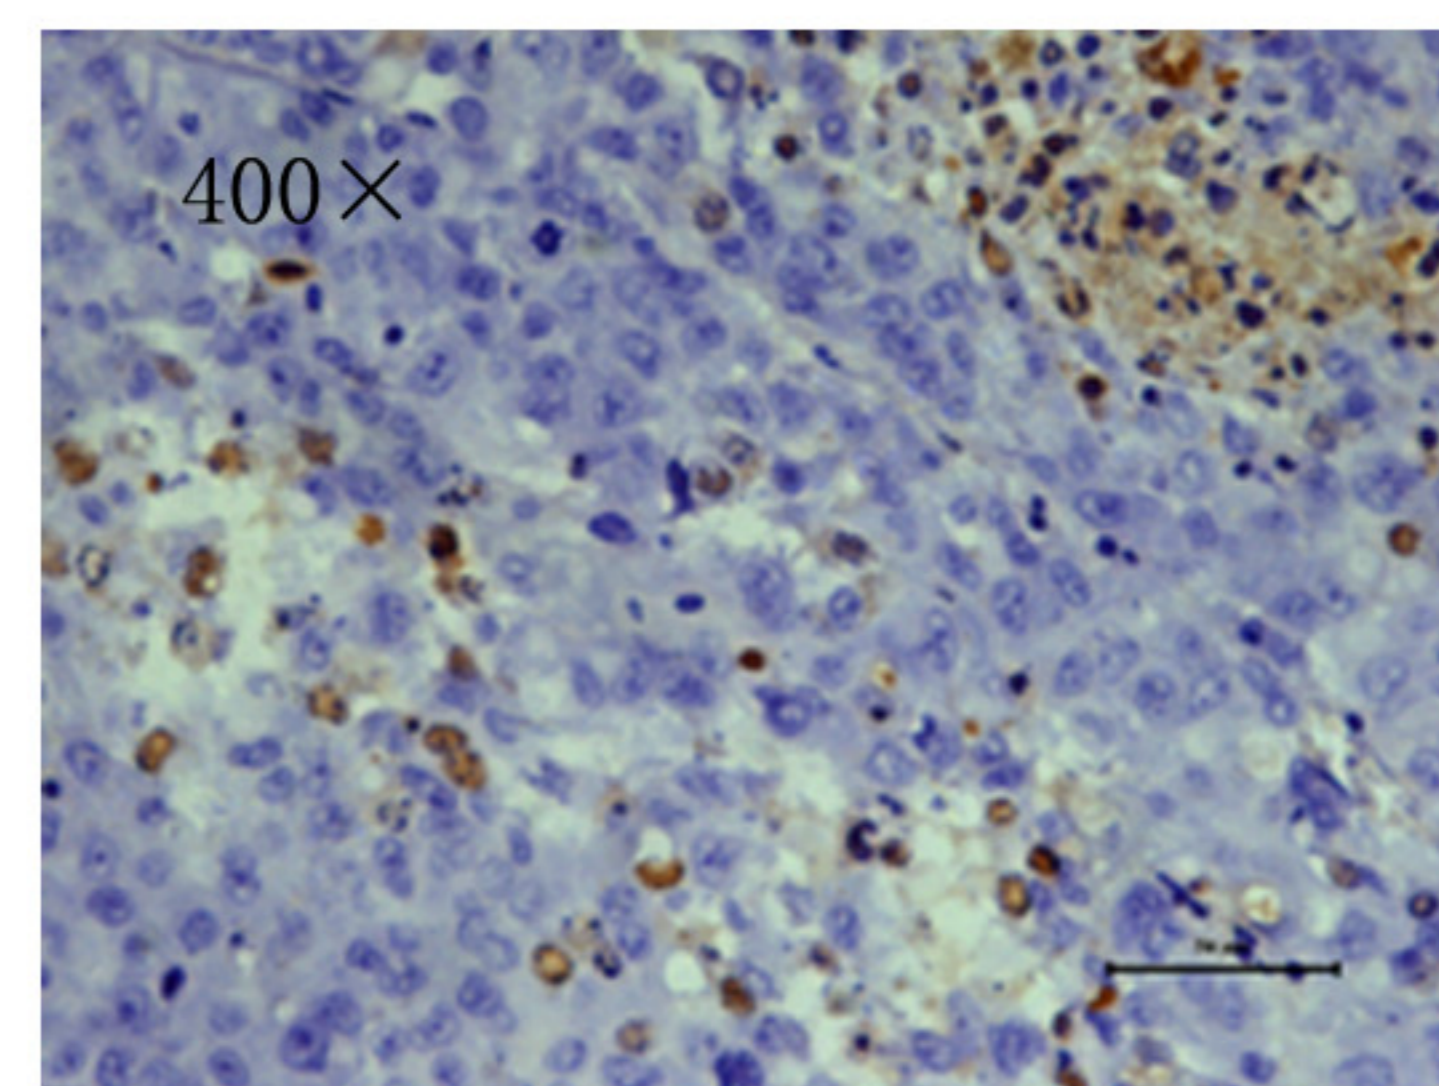

Oxaliplatin treatment group (day 2)

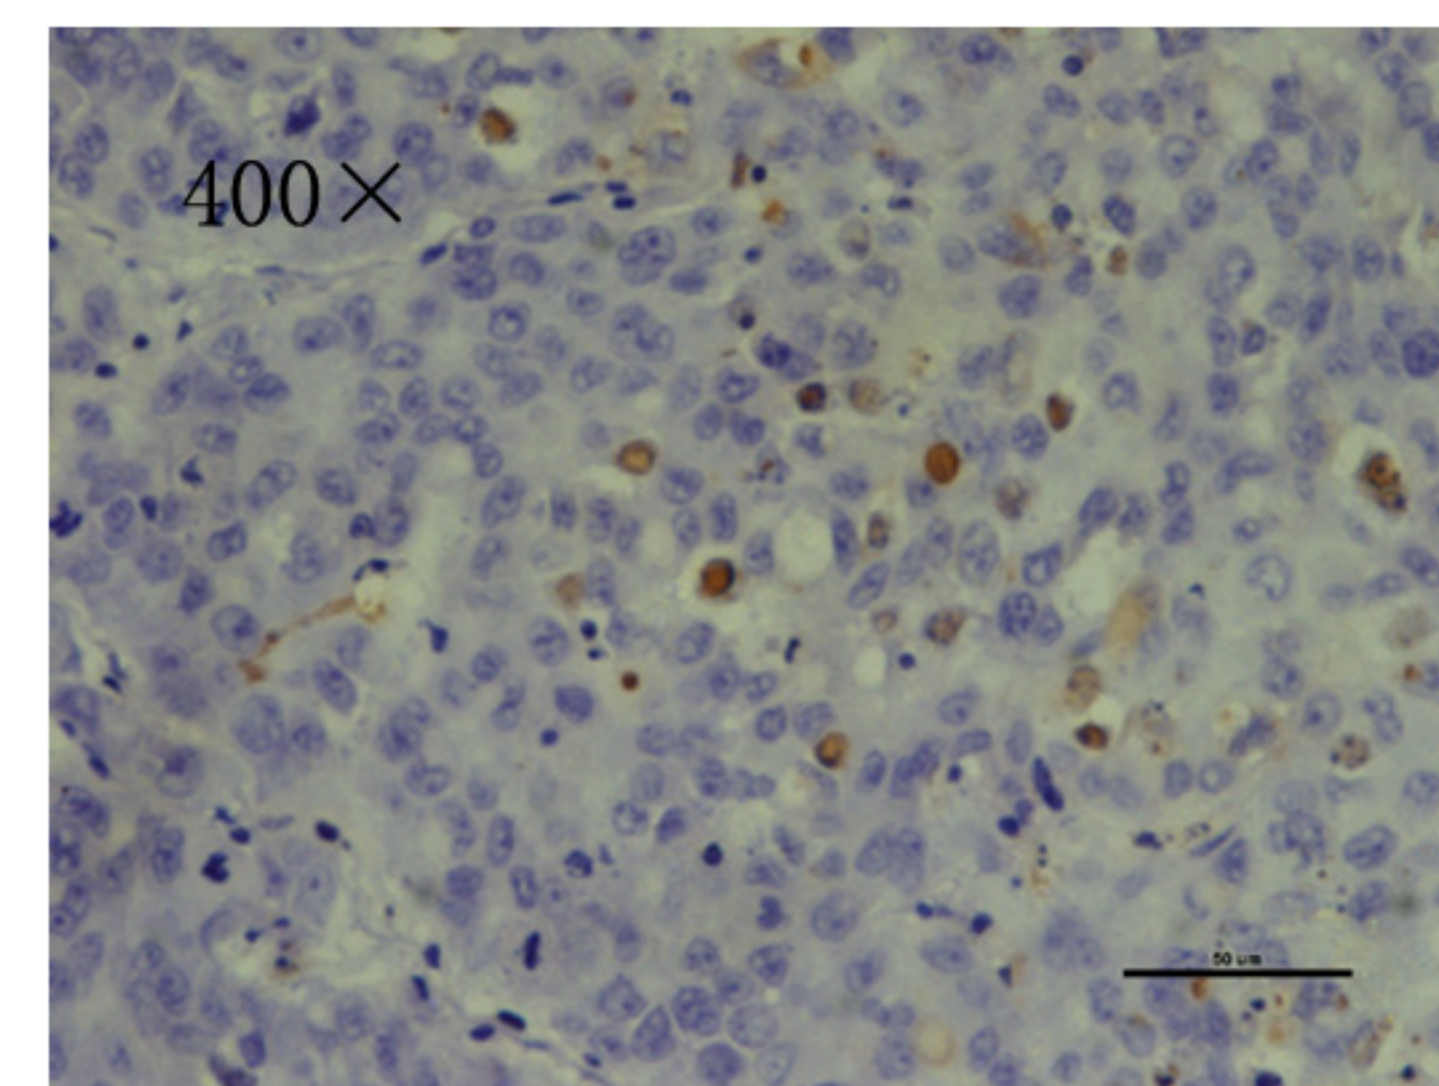

Oxaliplatin treatment group (day 7)

Supplement: MOESM8 [file 9460322]
